# Supplementary material
Source: Springer Nature journal article supplement (https://www.springermedizin.de/resource/supplementary/13049_2012_574_MOESM1_ESM.pdf/9666844)

# Inhalation Injury and Burn Size

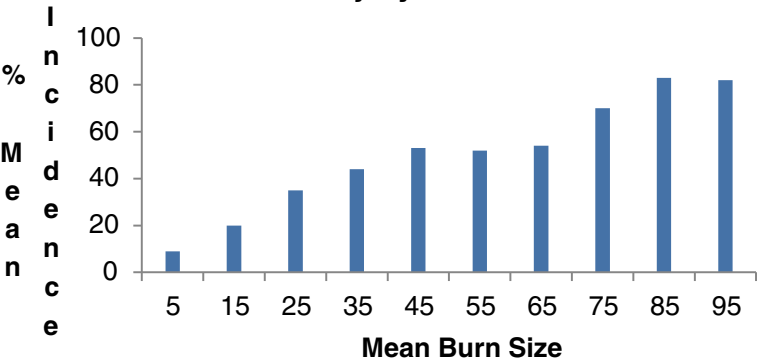

Supplement: MOESM1 [file 9666844]
